# Supplementary material for: Application of Biocompatible Noble Metal Film Materials to Medical Implants: TiNi Surface Modification
Source: MDPI journal article supplement (doi:10.3390/coatings13020222), 2023-01-18
Supplement: s1 [file s1]

*Supplementary Materials to*

# **Application of biocompatible noble metal film materials to medical implants: TiNi surface modification**

Evgeniia S. Vikulova <sup>1</sup>, Ksenya I. Karakovskaya <sup>1</sup>, Ilya V. Korolkov <sup>1,\*</sup>, Tatyana P. Koretskaya <sup>1</sup>, Elena V. Chepeleva <sup>2</sup>, Nikolay B. Kuz'min <sup>3</sup>, Anastasia D. Fedorenko <sup>1</sup>, Denis P. Pischur <sup>1</sup>, Tatiana Ya. Guselnikova <sup>1</sup>, Eugene A. Maksimovskii <sup>1</sup>, Ekaterina S. Marchenko <sup>4</sup>, Aleksander A. Zheravin <sup>2,\*</sup>, Natalya B. Morozova <sup>1,\*</sup>

<sup>1</sup> Nikolaev Institute of Inorganic Chemistry, Siberian Branch, Russian Academy of Sciences, Ac. Lavrentiev Ave. 3, Novosibirsk 630090, Russia

<sup>2</sup> Meshalkin National Medical Research Center, Ministry of Public Health of the Russian Federation, Rechkunovskaya Str. 15, Novosibirsk 630055, Russia

<sup>3</sup> Rzhanov Institute of Semiconductor Physics, Siberian Branch, Russian Academy of Sciences, Ac. Lavrentiev Ave. 13, 630090 Novosibirsk, Russia

<sup>4</sup> Kuznetsov Siberian Physical-Technical Institute, Tomsk State University, Novosobornaya, Sq. 1, Tomsk 634050, Russia;

\* Correspondence: korolkov@niic.nsc.ru (I.V.K.), a\_zheravin@meshalkin.ru (A.A.Zh.), mor@niic.nsc.ru (N.B.M.)

a

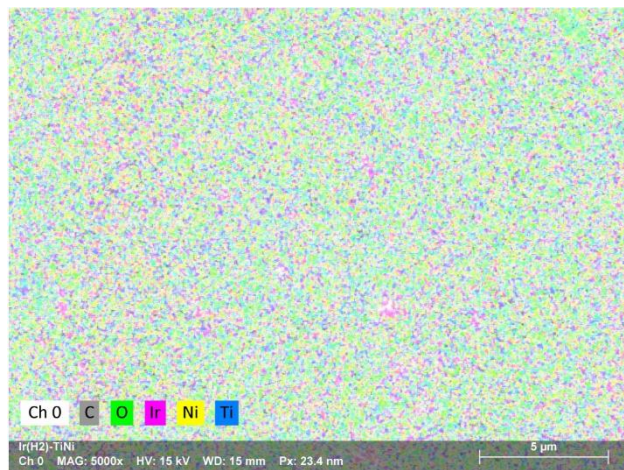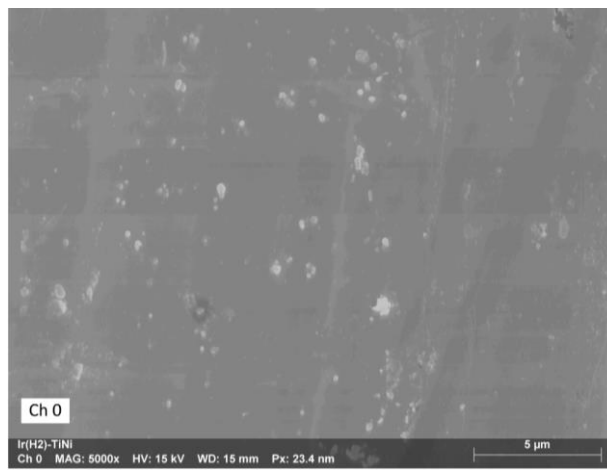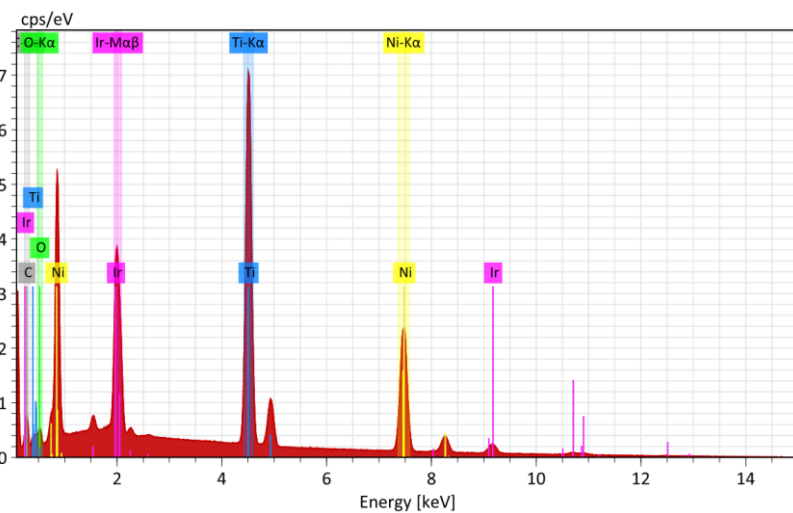

b

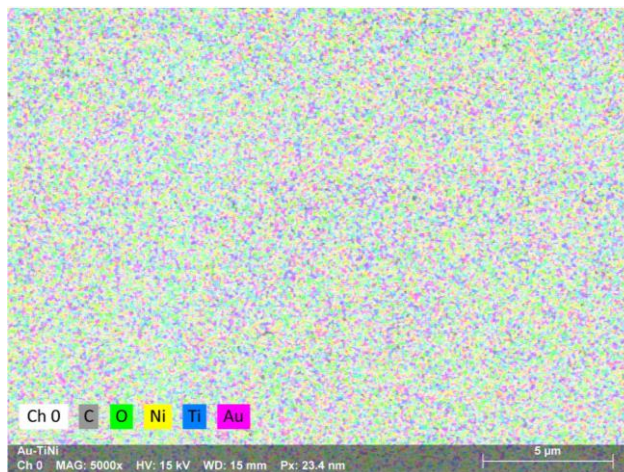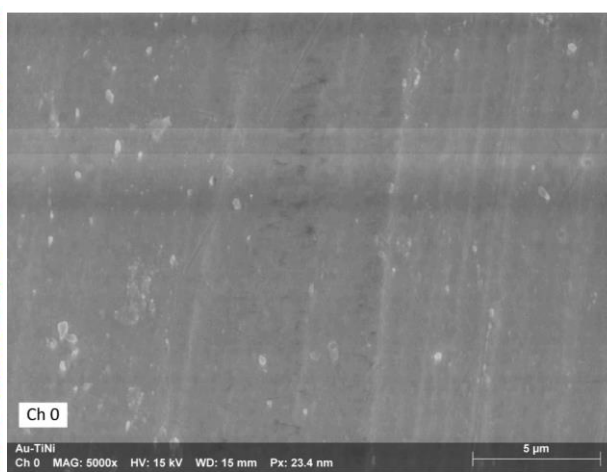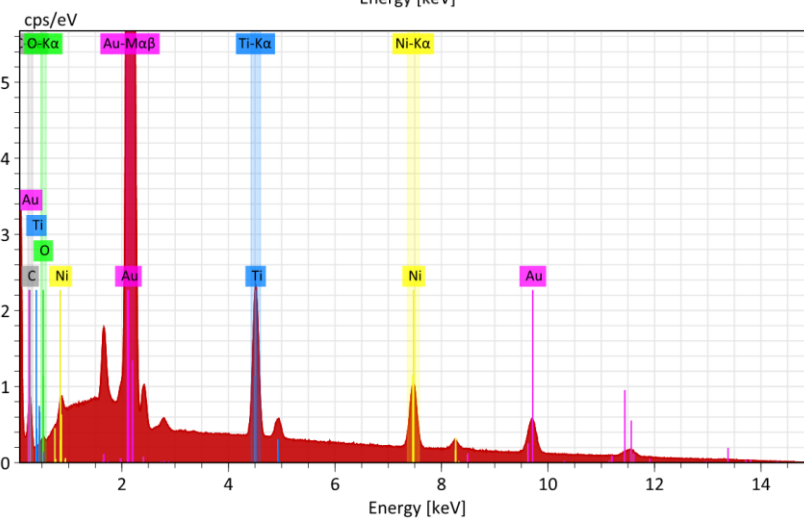

c

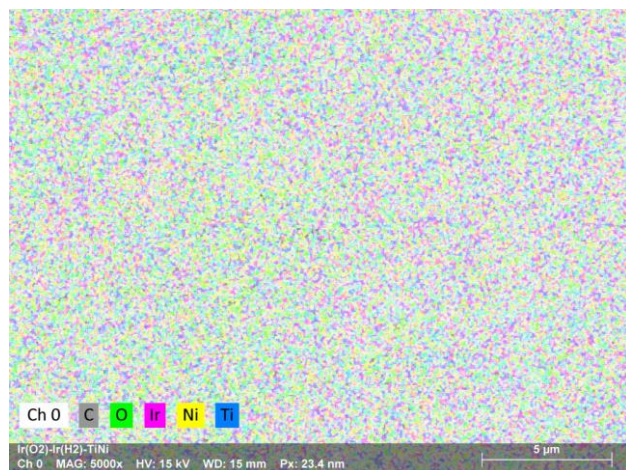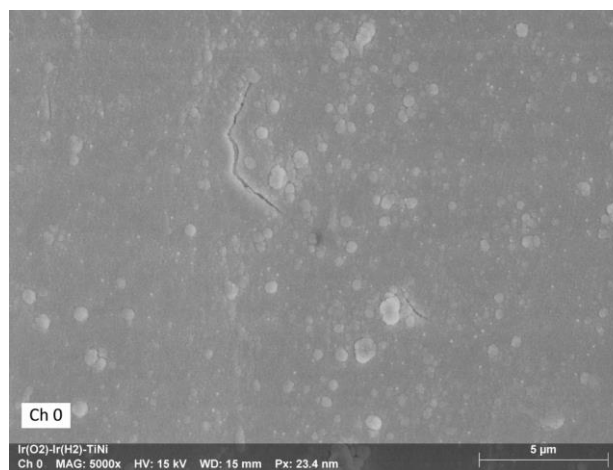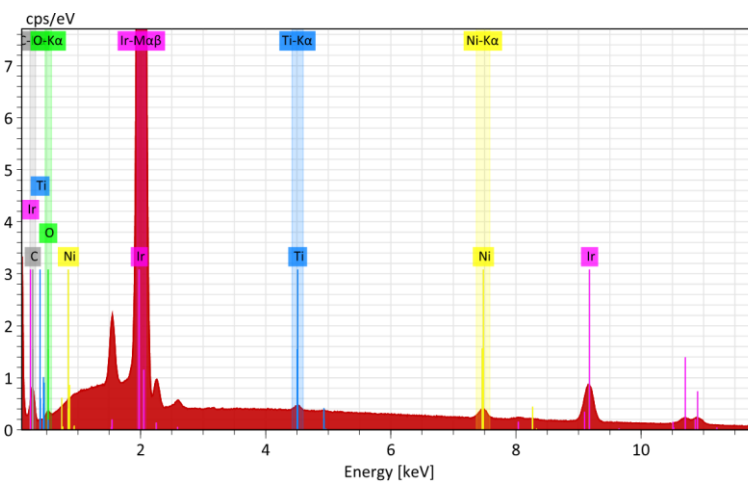

d

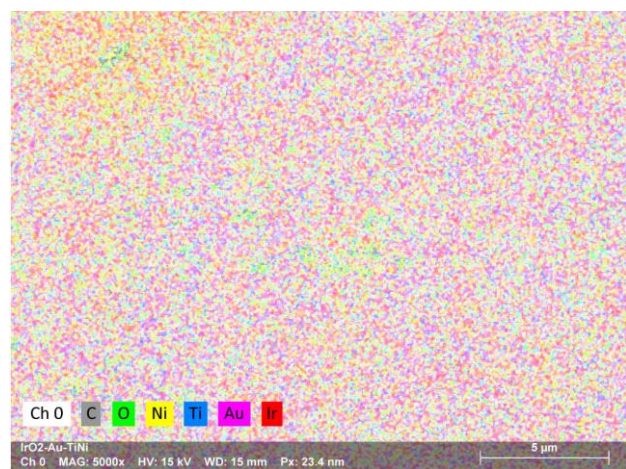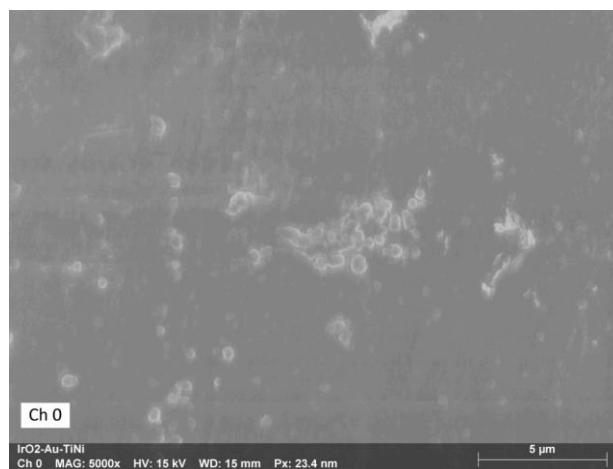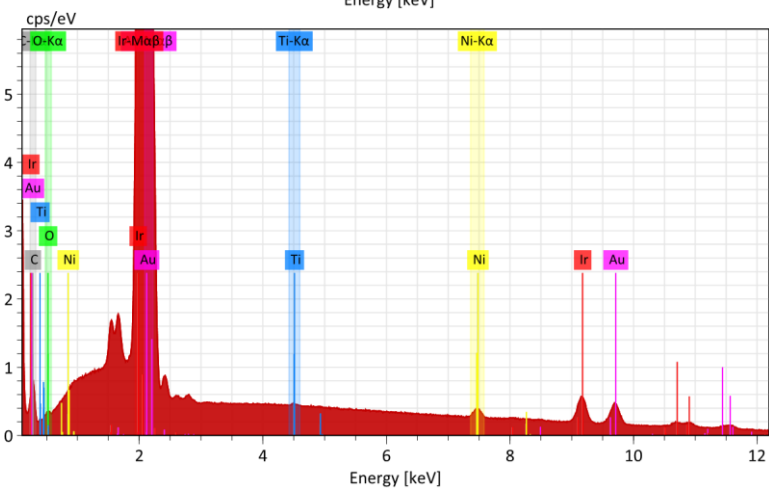

**Figure S1.** EDX elemental mapping of TiNi coated with noble metal films: (a) Ir'/TiNi; (b) Au/TiNi; (c) Ir/Ir'/TiNi; (d) Ir/Au/TiNi.



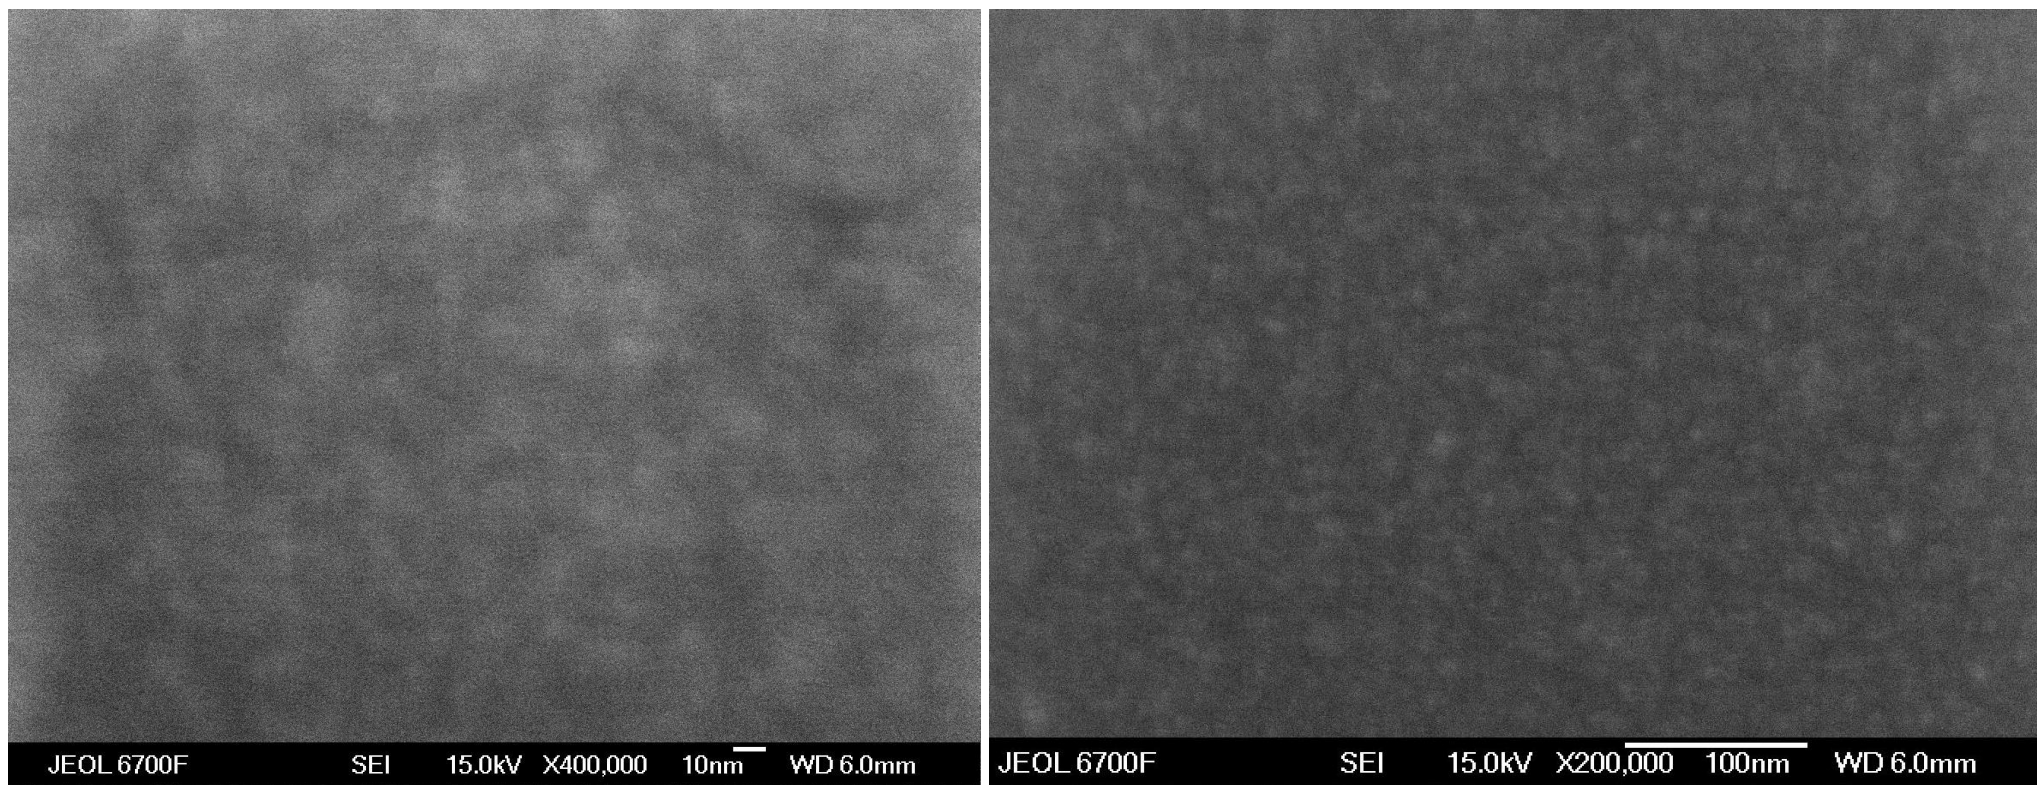

**Figure S2.** Typical high-resolution SEM images (magnification 400,000 and 200,000) of the surface of compact iridium layers on Si substrates (Sample 3).

**a**

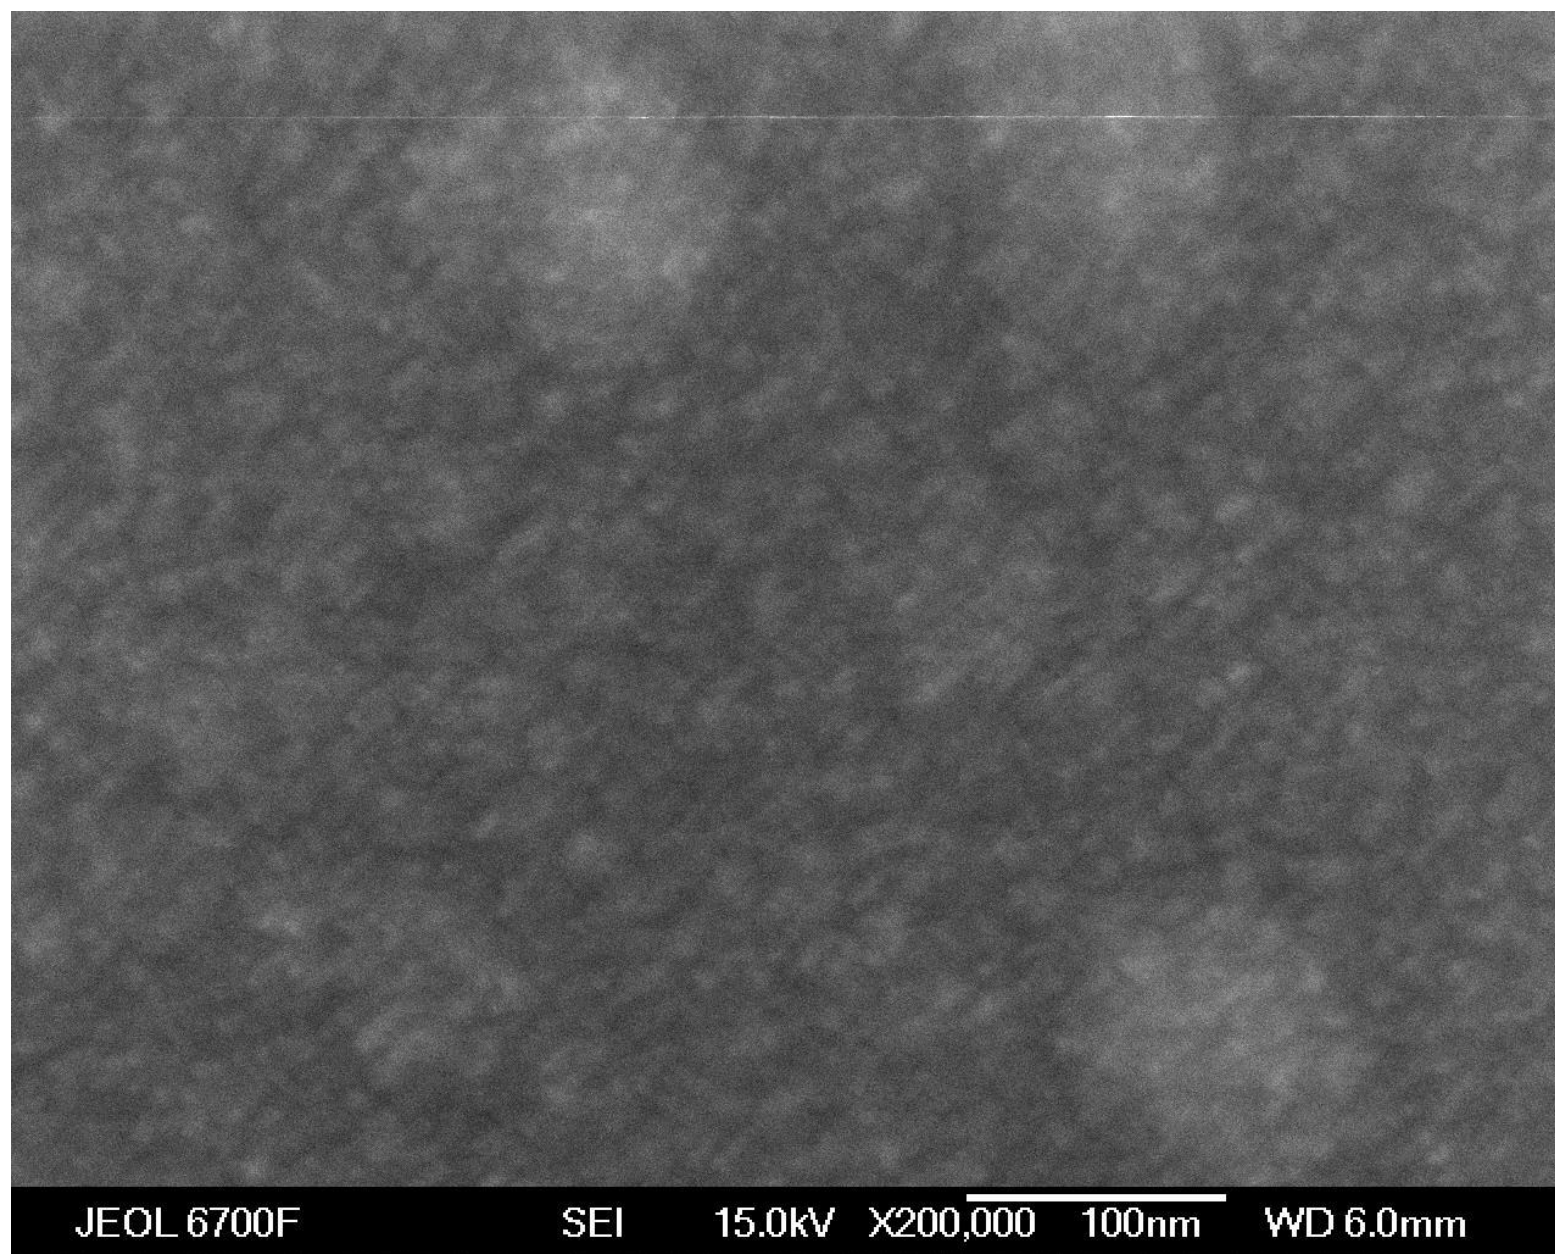

**b**

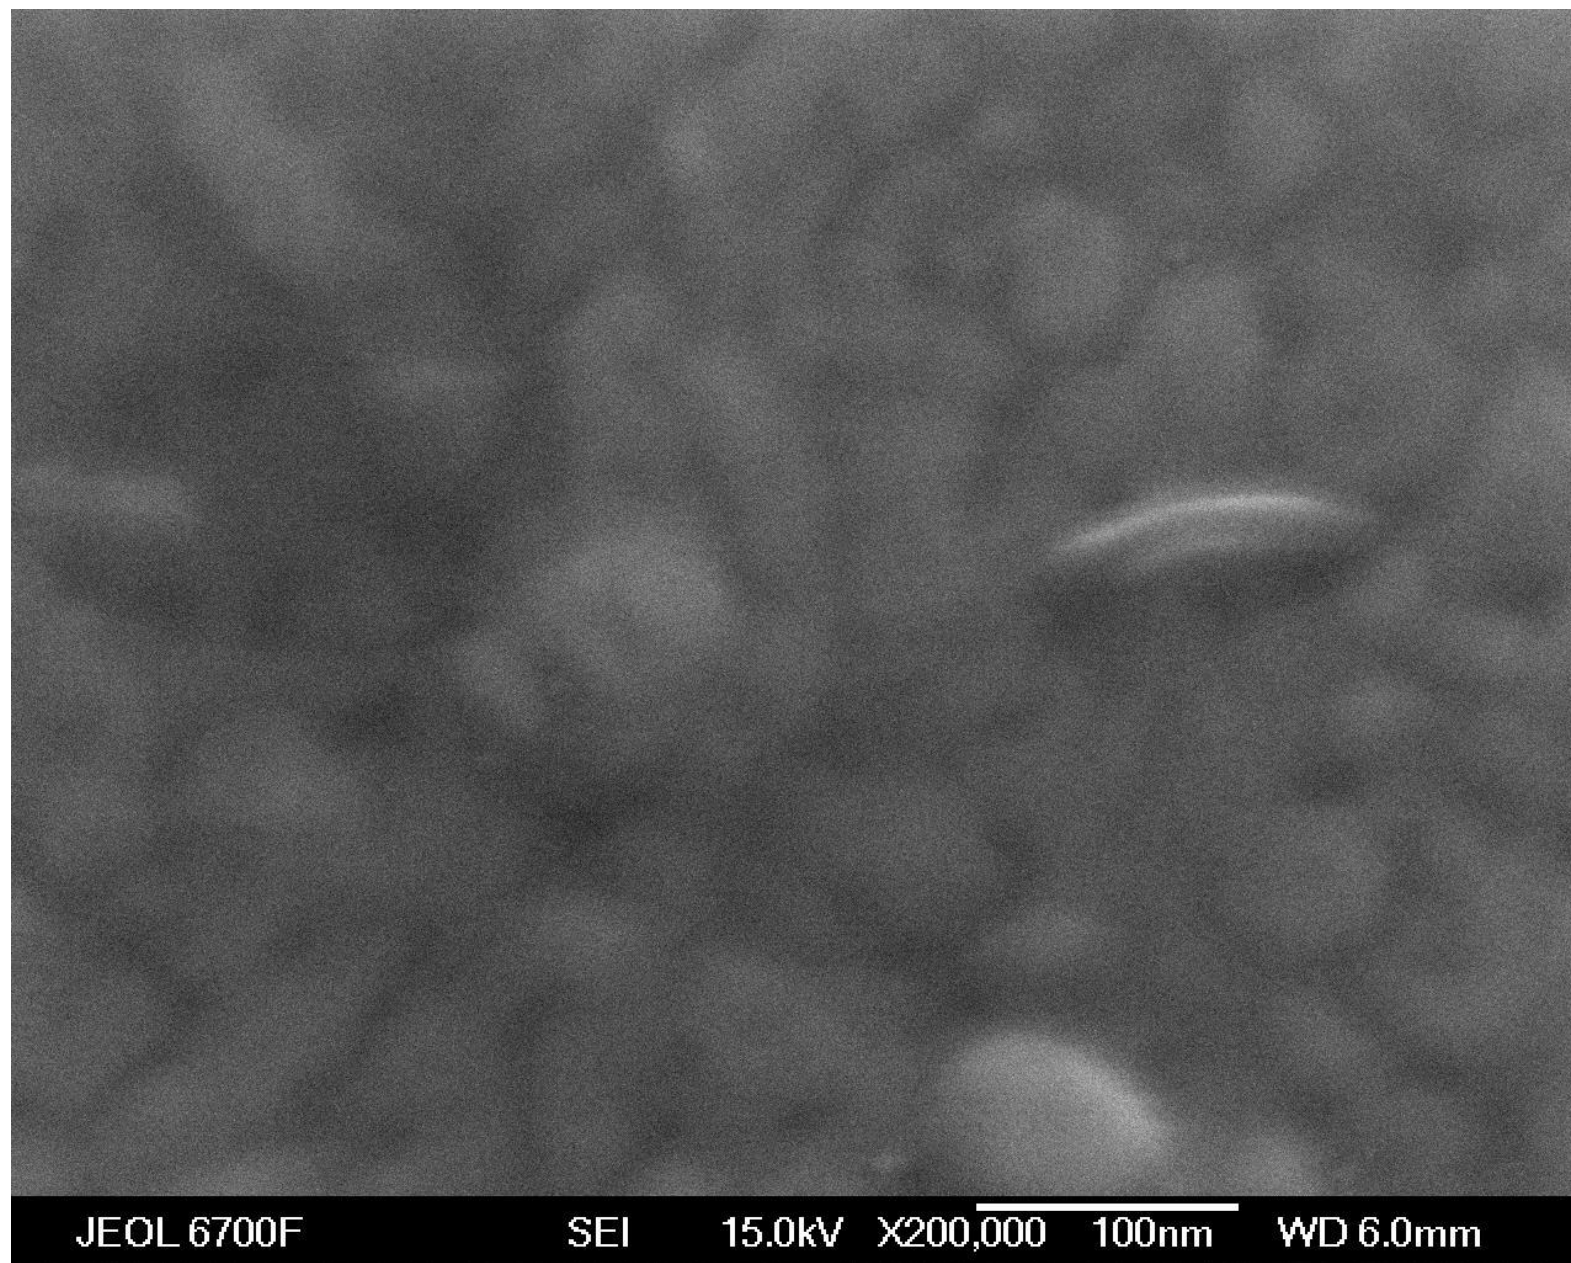



c

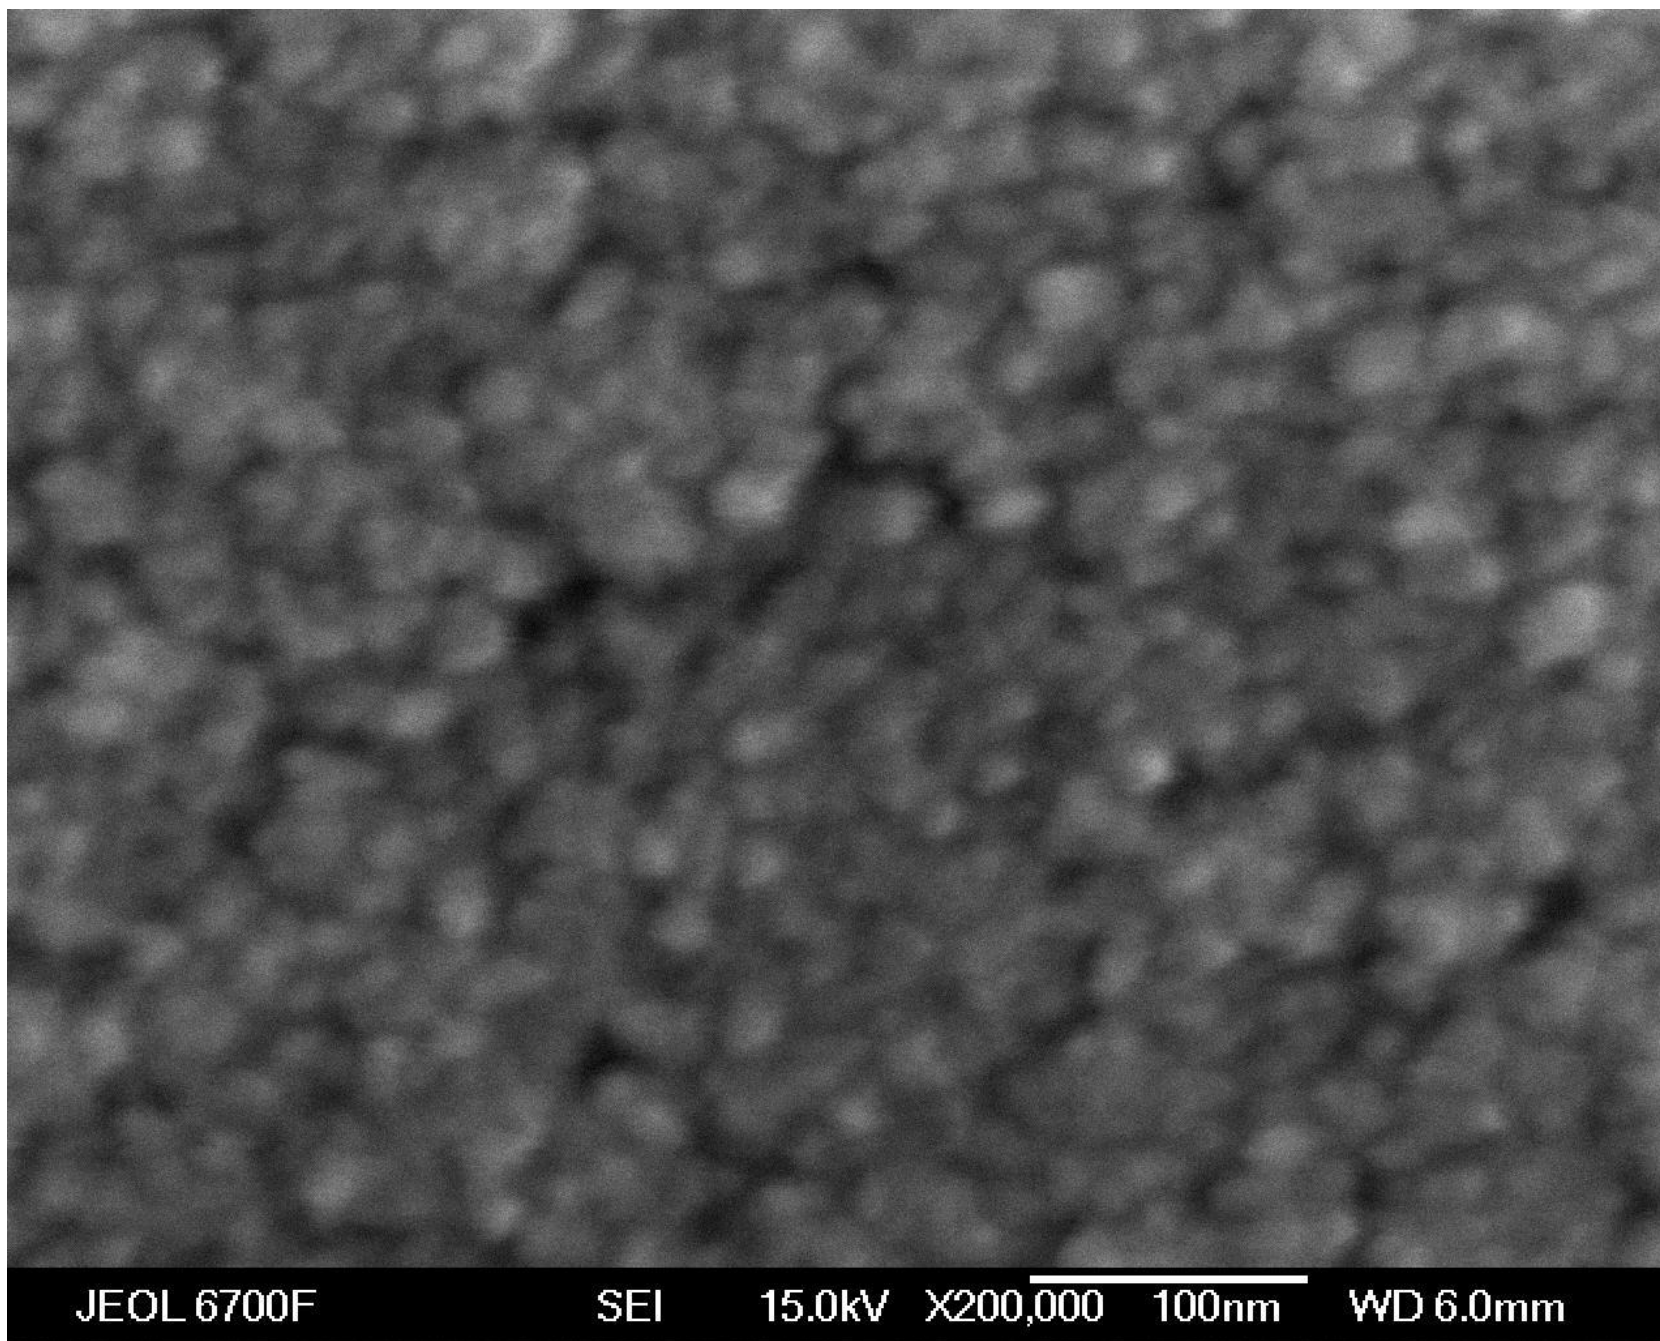

d

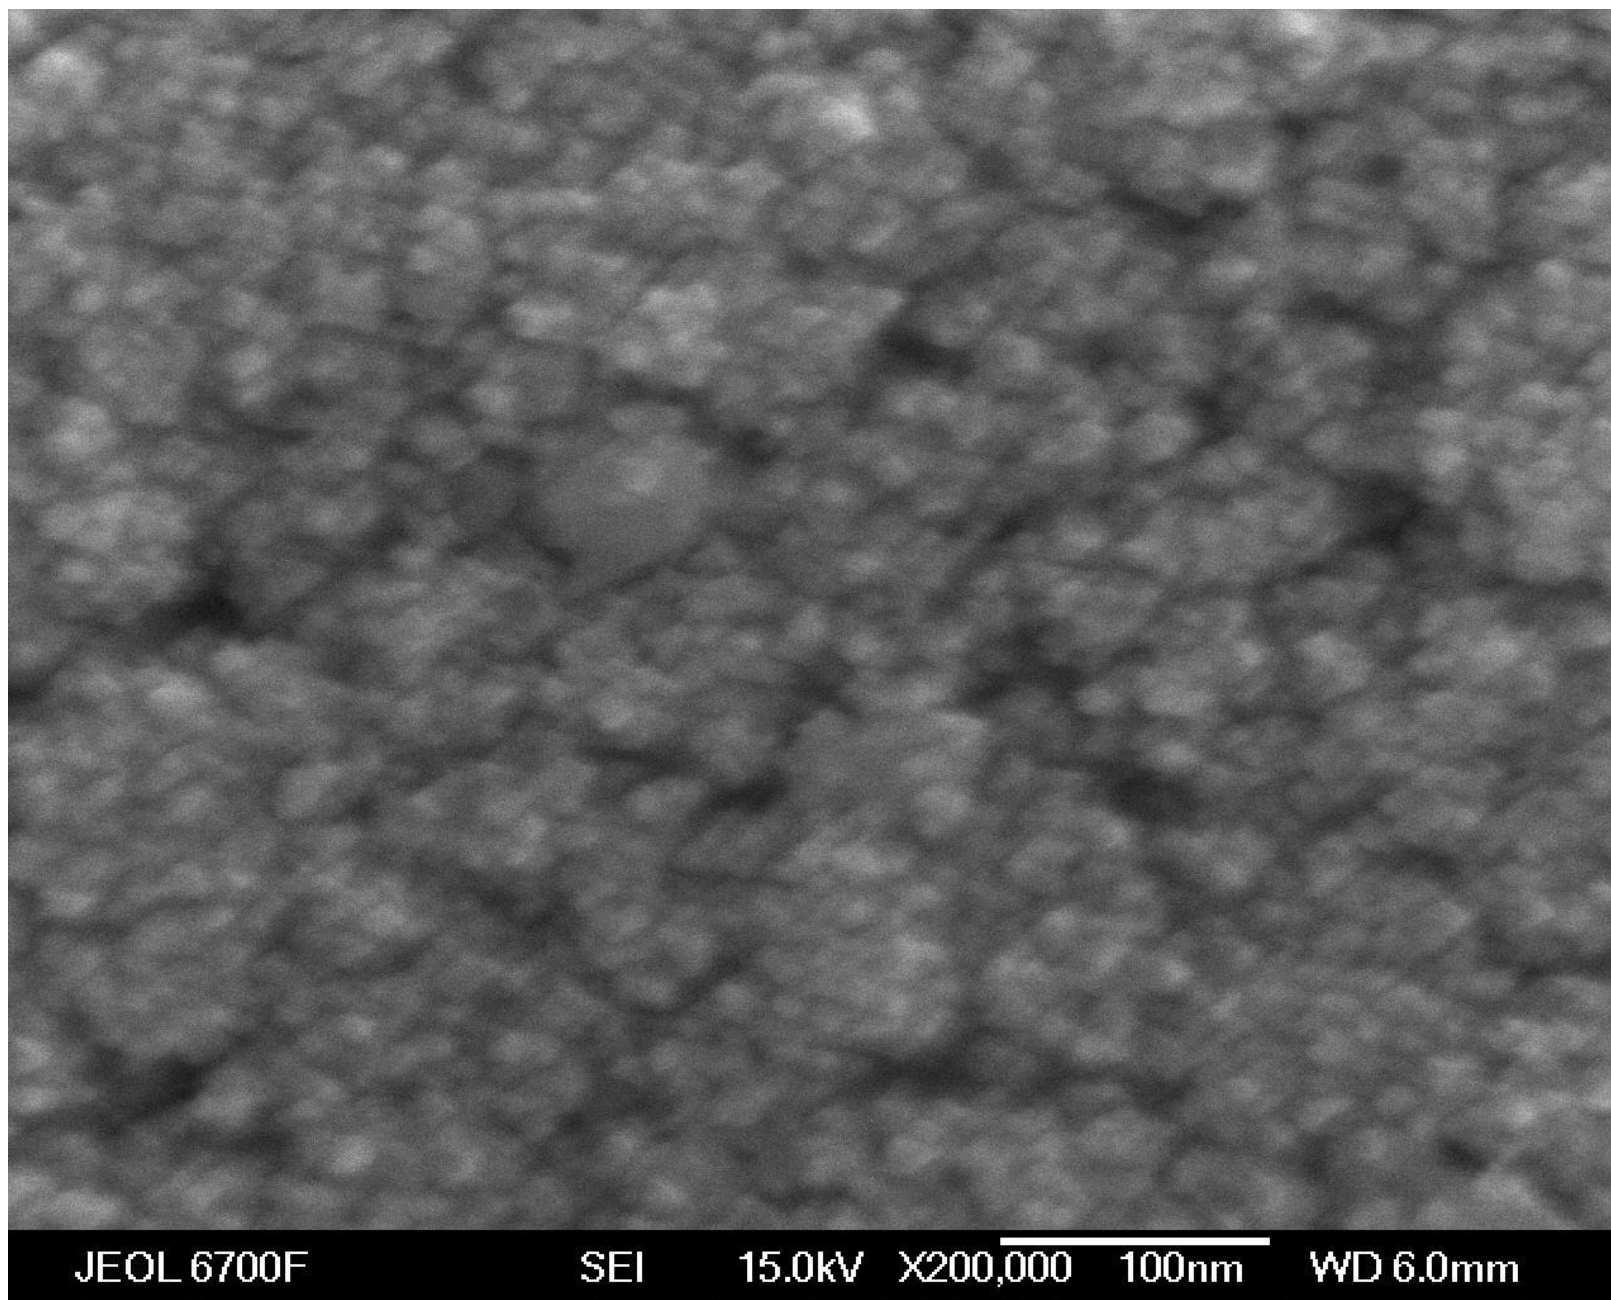

**Figure S3.** High-resolution SEM images (magnification 200,000) of the surface of noble metal films on TiNi substrates: (a) Ir'/TiNi; (b) Au/TiNi; (c) Ir/Ir'/TiNi; (d) Ir/Au/TiNi.



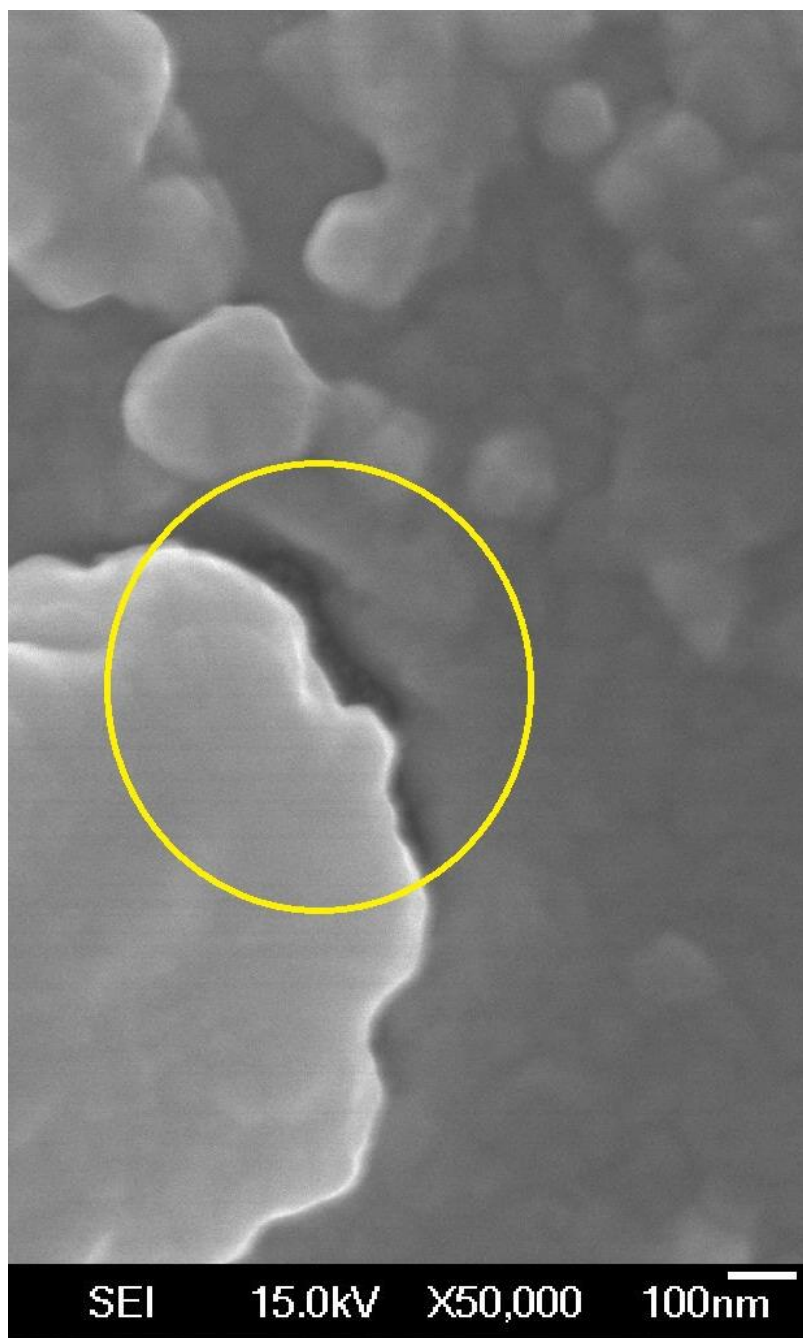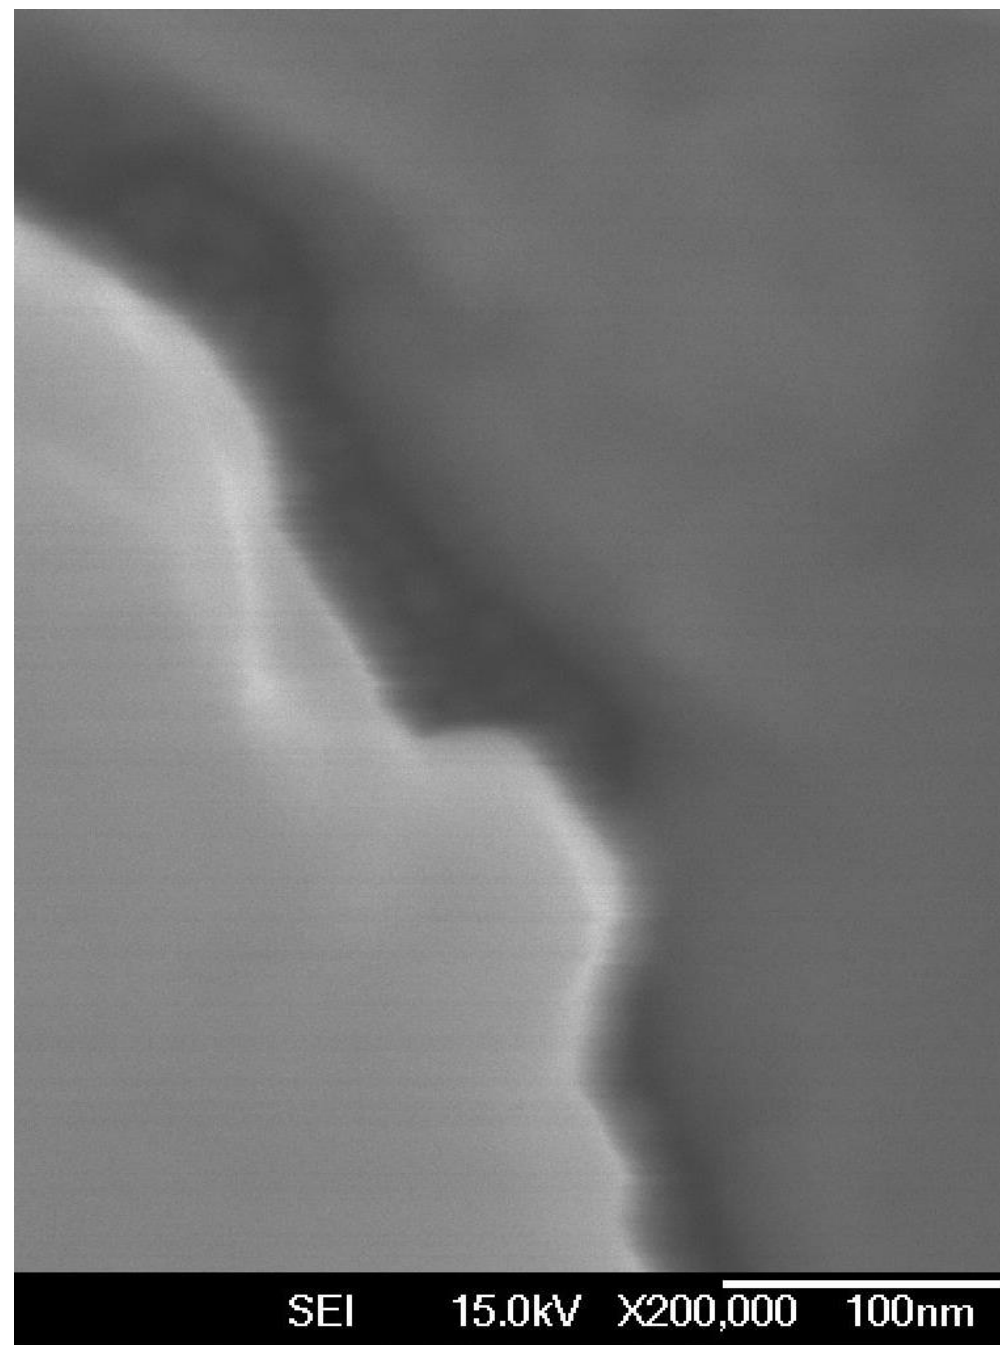

**Figure S4.** High-resolution SEM images (magnification 50,000 and 200,000) of the cracks in Au layer on TiNi substrate.
